# Supplementary material
Source: HighWire-hosted journal article supplement (https://qualitysafety.bmj.com/content/32/3/160)
Supplement: inline-supplementary-material-1 [file inline-supplementary-material-1.pdf]

## Supplemental Material

### Table of Contents

#### Tables

|                                                                    |   |
|--------------------------------------------------------------------|---|
| Supplementary Table 1. Debriefing with Good Judgment and TeamGAINS | 2 |
|--------------------------------------------------------------------|---|

#### Figures

|                                                                                                                                                                                                              |   |
|--------------------------------------------------------------------------------------------------------------------------------------------------------------------------------------------------------------|---|
| Supplementary Figure 1. Illustration of coding process with INTERACT software.                                                                                                                               | 3 |
| Supplementary Figure 2. Illustration of data coded with INTERACT software.                                                                                                                                   | 4 |
| Supplementary Figure 3. Example of debriefers' advocacy-inquiry—a combination of feedback (consisting of an observation and an opinion) and an open-ended question and participants' mental model statements | 5 |

Supplementary Table 1. Debriefing with Good Judgment and TeamGAINS

|                                    | <b>Debriefing with Good Judgment</b>                                                                                                                                                                    | <b>TeamGAINS</b>                                                                                                                                                                                                                                                                                                                                            |
|------------------------------------|---------------------------------------------------------------------------------------------------------------------------------------------------------------------------------------------------------|-------------------------------------------------------------------------------------------------------------------------------------------------------------------------------------------------------------------------------------------------------------------------------------------------------------------------------------------------------------|
| Approach                           | Providing a context for exploring participants' thinking processes and behavior change by combining honesty with curiosity and high regard of participants; help exploring and closing performance gaps | Exploring team interaction processes by combining three debriefing approaches: guided team self-correction <sup>1</sup> , debriefing with good judgment <sup>2</sup> and circular questions <sup>3</sup>                                                                                                                                                    |
| Structure                          | <ol style="list-style-type: none"> <li>1. Pre-brief to establish psychological safety</li> <li>2. Reactions</li> <li>3. Facts</li> <li>4. Analysis</li> <li>5. Summary</li> </ol>                       | <ol style="list-style-type: none"> <li>1. Pre-brief to establish psychological safety</li> <li>2. Reactions</li> <li>3. Facts</li> <li>4. Transfer from simulation to clinical work</li> <li>5. Analysis based on expert model via guided team self-correction, good judgment and circular questions</li> <li>6. Summary and re-do (if required)</li> </ol> |
| Reference and detailed description | <sup>2 4 5</sup>                                                                                                                                                                                        | <sup>6</sup>                                                                                                                                                                                                                                                                                                                                                |

## References

1. Smith-Jentsch KA, Cannon-Bowers JA, Tannenbaum S, et al. Guided team self-correction: Impacts on team mental models, processes, and effectiveness. *Small Group Research* 2008;39:303-29.
2. Rudolph JW, Simon R, Rivard P, et al. Debriefing with good judgment: Combining rigorous feedback with genuine inquiry. *Anesthesiol Clin* 2007;25:361-76.
3. Kolbe M, Marty A, Seelandt J, et al. How to debrief teamwork interactions: using circular questions to explore and change team interaction patterns. *Adv Simul (Lond)* 2016;1(1):29. doi: 10.1186/s41077-016-0029-7
4. Rudolph JW, Simon R, Raemer DB, et al. Debriefing as formative assessment: closing performance gaps in medical education. *Acad Emerg Med* 2008;15(11):1010-6. doi: 10.1111/j.1553-2712.2008.00248.x
5. Rudolph JW, Foldy EG, Robinson T, et al. Helping without harming. The instructor's feedback dilemma in debriefing--A case study. *Simul Healthc* 2013;8:304-16.
6. Kolbe M, Weiss M, Grote G, et al. TeamGAINS: a tool for structured debriefings for simulation-based team trainings. *BMJ Qual Saf* 2013;22:541-53. doi: 10.1136/bmjqs-2012-000917

Supplementary Figure 1. Illustration of coding process with INTERACT software.

The screenshot shows the INTERACT software interface. The main window displays a list of events for a video recording titled 'Kommunikation'. The events are listed in a table with columns for time, date, and event name. A central control panel shows a video player with a 'Live observation' button and a 'Normal speed' indicator. On the right, a 'Current Codes [SNF\_Codes\_ohnePrefix.ikey]' table lists codes and their attributes.

| Key | Code          | Dur | Excl                                | Class         | Lex.chain | Prefix | EOC                                 |
|-----|---------------|-----|-------------------------------------|---------------|-----------|--------|-------------------------------------|
| b   | Beobachtung   |     | <input checked="" type="checkbox"/> | Kommunikation | SNF_Mas   |        | <input checked="" type="checkbox"/> |
| e   | Bewertung     |     | <input checked="" type="checkbox"/> | Kommunikation | SNF_Mas   |        | <input checked="" type="checkbox"/> |
| i   | Interp_Beob   |     | <input checked="" type="checkbox"/> | Kommunikation | SNF_Mas   |        | <input checked="" type="checkbox"/> |
| a   | Anecdote      |     | <input checked="" type="checkbox"/> | Kommunikation | SNF_Mas   |        | <input checked="" type="checkbox"/> |
| p   | Appreciation  |     | <input checked="" type="checkbox"/> | Kommunikation | SNF_Mas   |        | <input checked="" type="checkbox"/> |
| D   | Demonstration |     | <input checked="" type="checkbox"/> | Kommunikation | SNF_Mas   |        | <input checked="" type="checkbox"/> |
| r   | Dirty         |     | <input checked="" type="checkbox"/> | Kommunikation | SNF_Mas   |        | <input checked="" type="checkbox"/> |
| o   | Roleplay      |     | <input checked="" type="checkbox"/> | Kommunikation | SNF_Mas   |        | <input checked="" type="checkbox"/> |
| 4   | Inq_Offen     |     | <input checked="" type="checkbox"/> | Kommunikation | SNF_Mas   |        | <input checked="" type="checkbox"/> |
| h   | Behavior      |     | <input checked="" type="checkbox"/> | Kommunikation | SNF_Mas   |        | <input checked="" type="checkbox"/> |
| c   | Cognition     |     | <input checked="" type="checkbox"/> | Kommunikation | SNF_Mas   |        | <input checked="" type="checkbox"/> |
| m   | Emotion       |     | <input checked="" type="checkbox"/> | Kommunikation | SNF_Mas   |        | <input checked="" type="checkbox"/> |
| E   | Realism       |     | <input checked="" type="checkbox"/> | Kommunikation | SNF_Mas   |        | <input checked="" type="checkbox"/> |
| A   | Name          |     | <input checked="" type="checkbox"/> | Kommunikation | SNF_Mas   |        | <input checked="" type="checkbox"/> |
| s   | Idea_solution |     | <input checked="" type="checkbox"/> | Kommunikation | SNF_Mas   |        | <input checked="" type="checkbox"/> |

Supplementary Figure 2. Illustration of data coded with INTERACT software.

The screenshot displays the INTERACT software interface. The main window shows a list of coded events with columns for 'Time', 'Key', 'Code', 'Dur', 'Excl', 'Class', 'Lex chain', 'Proto', and 'EDC'. A 'Current Codes' dialog box is open, showing a list of codes with checkboxes for selection. The 'Current Codes' dialog box contains the following table:

| Key | Code           | Dur | Excl                     | Class         | Lex chain | Proto                    | EDC                      |
|-----|----------------|-----|--------------------------|---------------|-----------|--------------------------|--------------------------|
| 1   | Beobachtung    |     | <input type="checkbox"/> | Kommunikation | SNF_Mas   | <input type="checkbox"/> | <input type="checkbox"/> |
| e   | Bewertung      |     | <input type="checkbox"/> | Kommunikation | SNF_Mas   | <input type="checkbox"/> | <input type="checkbox"/> |
| l   | Interp. Zweck  |     | <input type="checkbox"/> | Kommunikation | SNF_Mas   | <input type="checkbox"/> | <input type="checkbox"/> |
| a   | Anecdote       |     | <input type="checkbox"/> | Kommunikation | SNF_Mas   | <input type="checkbox"/> | <input type="checkbox"/> |
| p   | Appreciation   |     | <input type="checkbox"/> | Kommunikation | SNF_Mas   | <input type="checkbox"/> | <input type="checkbox"/> |
| D   | Demonstration  |     | <input type="checkbox"/> | Kommunikation | SNF_Mas   | <input type="checkbox"/> | <input type="checkbox"/> |
| r   | Deny           |     | <input type="checkbox"/> | Kommunikation | SNF_Mas   | <input type="checkbox"/> | <input type="checkbox"/> |
| e   | Roleplay       |     | <input type="checkbox"/> | Kommunikation | SNF_Mas   | <input type="checkbox"/> | <input type="checkbox"/> |
| a   | Intc_Offen     |     | <input type="checkbox"/> | Kommunikation | SNF_Mas   | <input type="checkbox"/> | <input type="checkbox"/> |
| h   | Behavior       |     | <input type="checkbox"/> | Kommunikation | SNF_Mas   | <input type="checkbox"/> | <input type="checkbox"/> |
| c   | Cognition      |     | <input type="checkbox"/> | Kommunikation | SNF_Mas   | <input type="checkbox"/> | <input type="checkbox"/> |
| m   | Emotion        |     | <input type="checkbox"/> | Kommunikation | SNF_Mas   | <input type="checkbox"/> | <input type="checkbox"/> |
| E   | Realism        |     | <input type="checkbox"/> | Kommunikation | SNF_Mas   | <input type="checkbox"/> | <input type="checkbox"/> |
| A   | Italem         |     | <input type="checkbox"/> | Kommunikation | SNF_Mas   | <input type="checkbox"/> | <input type="checkbox"/> |
| s   | Idea_schleifen |     | <input type="checkbox"/> | Kommunikation | SNF_Mas   | <input type="checkbox"/> | <input type="checkbox"/> |

Supplementary Figure 3. Example of debriefers' advocacy-inquiry<sup>1</sup>—a combination of feedback (consisting of an observation and an opinion) and an open-ended question and participants' mental model statements

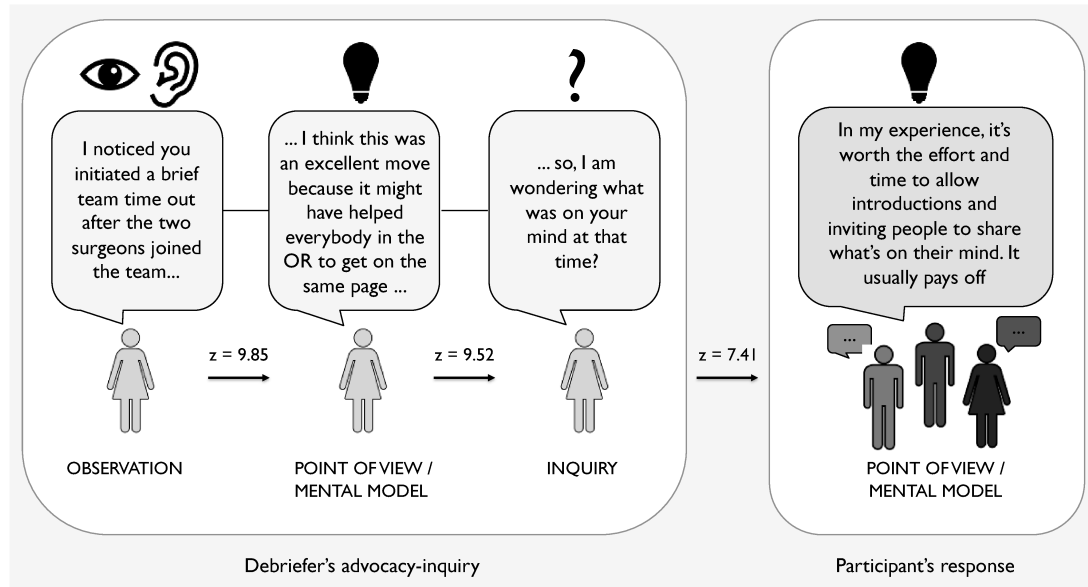

#### Reference

- <sup>1</sup>Rudolph, J. W., Simon, R., Rivard, P., Dufresne, R. L., & Raemer, D. B. (2007). Debriefing with good judgment: Combining rigorous feedback with genuine inquiry. *Anesthesiol Clin*, 25, 361-376.
